# Supplementary material
Source: HighWire-hosted journal article supplement (https://fg.bmj.com/highwire/filestream/143787/field_highwire_adjunct_files/0/flgastro-2021-102047supp001_data_supplement.pdf)
Supplement: flgastro-2021-102047supp001_data_supplement.pdf [file flgastro-2021-102047supp001_data_supplement.pdf]

## SUPPLEMENTARY MATERIALS

**Supplementary Table 1**

|                      | Diarrhoea           | Abdominal Pain      | Weight Loss       | Rectal Bleeding   | Row Totals               |
|----------------------|---------------------|---------------------|-------------------|-------------------|--------------------------|
| Group A              | 114 (108.68) [0.26] | 113 (121.65) [0.62] | 46 (43.25) [0.17] | 46 (45.42) [0.01] | 319                      |
| Group B              | 87 (92.32) [0.31]   | 112 (103.35) [0.72] | 34 (36.75) [0.21] | 38 (38.58) [0.01] | 271                      |
| <b>Column Totals</b> | 201                 | 225                 | 80                | 84                | <b>590 (Grand Total)</b> |

**Supplementary Table 1** shows distribution of the 4 top ranked presenting symptoms of suspected IBD in primary care.

**Supplementary Table 2**

| IBD Treatment initiated at endoscopy, no [%] | 68 (76) [89.5%] | 42 (52) [80.8%] |
|----------------------------------------------|-----------------|-----------------|
|                                              | UC (n=49)       | UC (n= 16)      |
| Oral mesalazine                              | 37 [75.5%]      | 9 [56.2%]       |
| Topical mesalazine                           | 35 [71.4%]      | 11 [84.6%]      |
| Hydrocortisone                               | 3 [6.1%]        | 0 [0%]          |
| Prednisolone                                 | 6 [12.2%]       | 1 [6.2%]        |
| Budesonide                                   | 3 [6.1%]        | 0 [0%]          |
| Anti-TNF with IMM                            | 3 [6.1%]        | 0 [0%]          |
| Anti-TNF monotherapy                         | 4 [8.2%]        | 0 [0%]          |
| IMM monotherapy                              | 1 [2.0%]        | 0 [0%]          |
|                                              | CD (n=21)       | CD (n=31)       |
| Hydrocortisone                               | 1 [4.7%]        | 0 [0%]          |
| Prednisolone                                 | 0 [0%]          | 3 [9.7%]        |
| Budesonide                                   | 13 [61.9%]      | 14 [45.2%]      |
| Anti-TNF with IMM                            | 3 [14.3%]       | 7 [22.6%]       |
| Anti-TNF monotherapy                         | 2 [9.5%]        | 7 [22.6%]       |
| IMM monotherapy                              | 1 [4.7%]        | 6 [19.4%]       |
| Ustekinumab                                  | 1 [4.7%]        | 1 [3.2%]        |
|                                              | IBDU (n=6)      | IBDU (n=5)      |
| Oral mesalazine                              | 2 [33.3%]       | 2 [40.0%]       |
| Topical mesalazine                           | 0 [0%]          | 1 [20.0%]       |
| Hydrocortisone                               | 1 [16.6%]       | 0 [0%]          |
| Prednisolone                                 | 0 [0%]          | 0 [0%]          |
| Budesonide                                   | 2 [33.3%]       | 1 [20.0%]       |
| Anti-TNF with IMM                            | 0 [0%]          | 1 [20.0%]       |
| Anti-TNF monotherapy                         | 0 [0%]          | 0 [0%]          |
| IMM monotherapy                              | 0 [0%]          | 0 [0%]          |

**Supplementary Table 2** shows treatment options for the different cohorts

**Supplementary Table 3**

| Further investigations    | Group A (n=35) | Group B (n=58) |
|---------------------------|----------------|----------------|
| Colonoscopy, n [(%)]      | 4 [11.4%]      | 1 [1.7%]       |
| Capsule endoscopy n [(%)] | 4 [11.4%]      | 2 [3.4%]       |
| MRI small bowel n [(%)]   | 5 [14.3%]      | 0 [0%]         |
| SeHCAT scan n [(%)]       | 4 [11.4%]      | 1 [1.7%]       |
| Gastroscopy n [(%)]       | 0 [0%]         | 1 [1.7%]       |

**Supplementary table 3:** Investigations for non-IBD patients

**Supplementary Figure 1**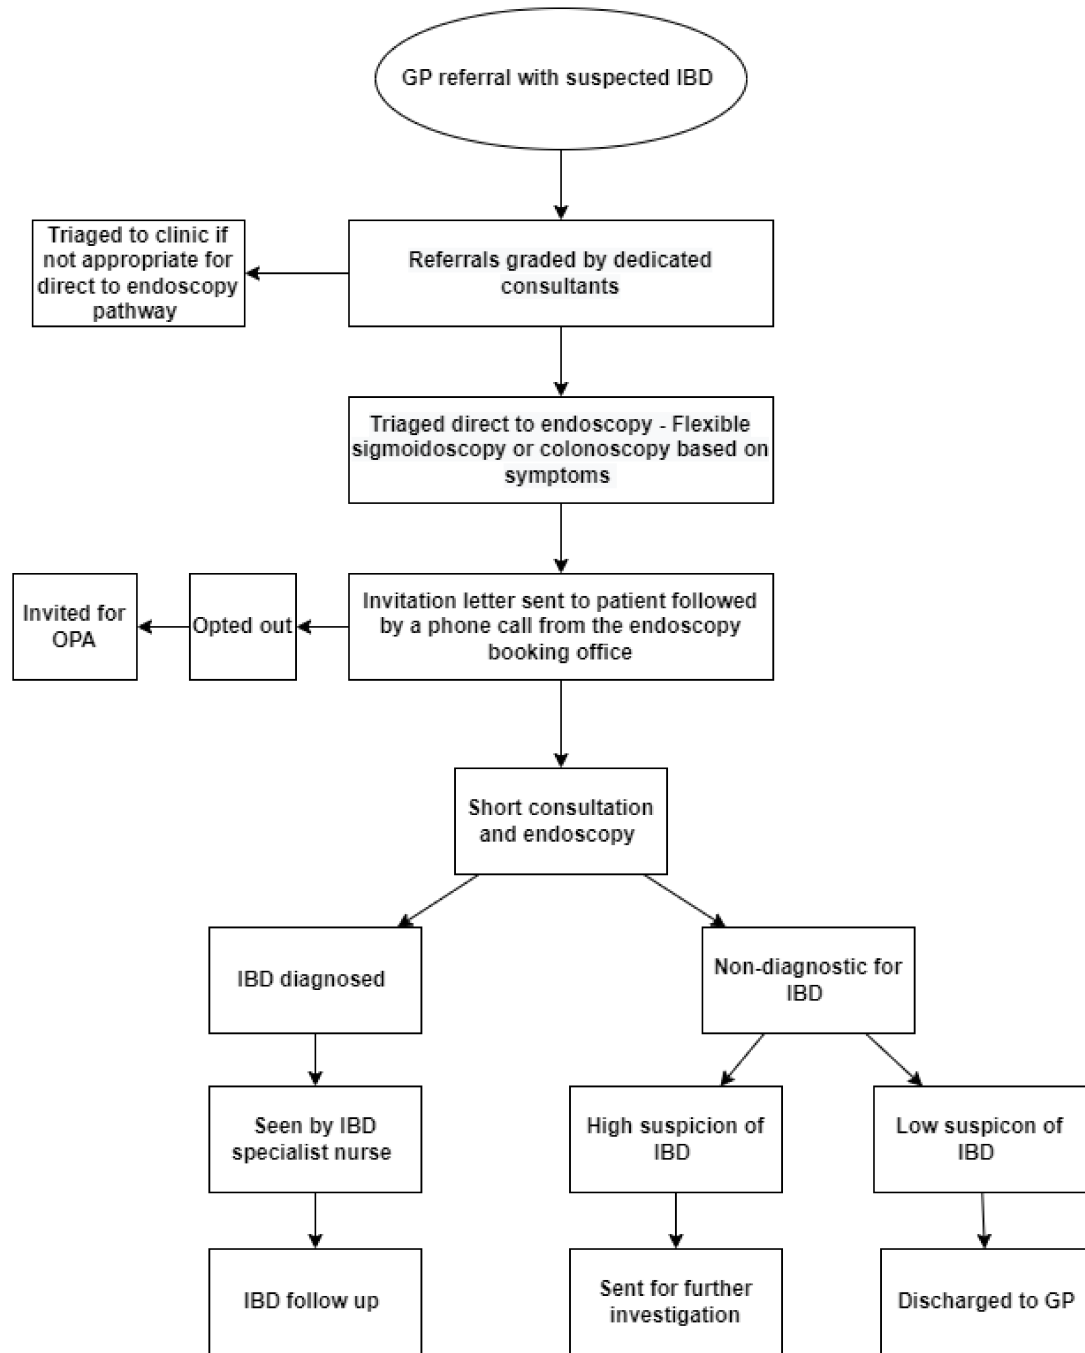

**Supplementary Figure 1:** shows the Direct-access, IBD-physician delivered endoscopy pathway

## Supplementary Figure 2

|                                                                                                                                                                                                                                                                                                                                                                                                                                                                                                                                                                                                                                                                                                                                                                                                                                                                                                                                                                                                                                                                                                                                                                     |                                                                                                                                                                                                                                                                                                                                                                                                                                                                                                                                                                                                                                                                                                                                                                                                                                                                                                                                       |
|---------------------------------------------------------------------------------------------------------------------------------------------------------------------------------------------------------------------------------------------------------------------------------------------------------------------------------------------------------------------------------------------------------------------------------------------------------------------------------------------------------------------------------------------------------------------------------------------------------------------------------------------------------------------------------------------------------------------------------------------------------------------------------------------------------------------------------------------------------------------------------------------------------------------------------------------------------------------------------------------------------------------------------------------------------------------------------------------------------------------------------------------------------------------|---------------------------------------------------------------------------------------------------------------------------------------------------------------------------------------------------------------------------------------------------------------------------------------------------------------------------------------------------------------------------------------------------------------------------------------------------------------------------------------------------------------------------------------------------------------------------------------------------------------------------------------------------------------------------------------------------------------------------------------------------------------------------------------------------------------------------------------------------------------------------------------------------------------------------------------|
| <p>Your GP has referred you to our gastroenterology service with suspected inflammatory bowel disease. The quickest way to arrive at a diagnosis and treatment, if appropriate, is to bring you directly to our endoscopy unit for a short consultation prior to a flexible sigmoidoscopy with one of our specialists in inflammatory bowel disease.</p> <p>A flexible sigmoidoscopy is a camera test to directly look at the lower bowel. This is an abbreviated form of a colonoscopy, however, it does not require a full bowel prep and takes less time.</p> <p>For information about a flexible sigmoidoscopy please see the attached information.</p> <p>I have included a stool sample called Calprotectin (with instructions on how to perform the test). This stool test measures the inflammation in your intestinal tract. I would be grateful if you could drop the completed stool sample at your GP or at the General Hospital in Southampton.</p> <p>You will be phoned by the endoscopy booking office soon to discuss the appointment details.</p> <p>Yours sincerely,</p> <p><i>Electronic signature will go here DO NOT REMOVE</i></p> <p>Dr</p> | <p>Your GP has referred you to our gastroenterology service with suspected inflammatory bowel disease. The quickest way to arrive at a diagnosis and treatment, if appropriate, is to bring you directly to our endoscopy unit for a short consultation prior to a colonoscopy with one of our specialists in inflammatory bowel disease.</p> <p>For information about a colonoscopy please see the attached information.</p> <p>I have included a stool sample called Calprotectin (with instructions on how to perform the test). This stool test measures the inflammation in your intestinal tract. I would be grateful if you could drop the completed stool sample at your GP or at the General Hospital in Southampton.</p> <p>You will be phoned by the endoscopy booking office soon to discuss the appointment details.</p> <p>Yours sincerely,</p> <p><i>Electronic signature will go here DO NOT REMOVE</i></p> <p>Dr</p> |
|---------------------------------------------------------------------------------------------------------------------------------------------------------------------------------------------------------------------------------------------------------------------------------------------------------------------------------------------------------------------------------------------------------------------------------------------------------------------------------------------------------------------------------------------------------------------------------------------------------------------------------------------------------------------------------------------------------------------------------------------------------------------------------------------------------------------------------------------------------------------------------------------------------------------------------------------------------------------------------------------------------------------------------------------------------------------------------------------------------------------------------------------------------------------|---------------------------------------------------------------------------------------------------------------------------------------------------------------------------------------------------------------------------------------------------------------------------------------------------------------------------------------------------------------------------------------------------------------------------------------------------------------------------------------------------------------------------------------------------------------------------------------------------------------------------------------------------------------------------------------------------------------------------------------------------------------------------------------------------------------------------------------------------------------------------------------------------------------------------------------|

**Supplementary Figure 2:** Direct to endoscopy pathway invitation letter

**Supplementary Figure 3**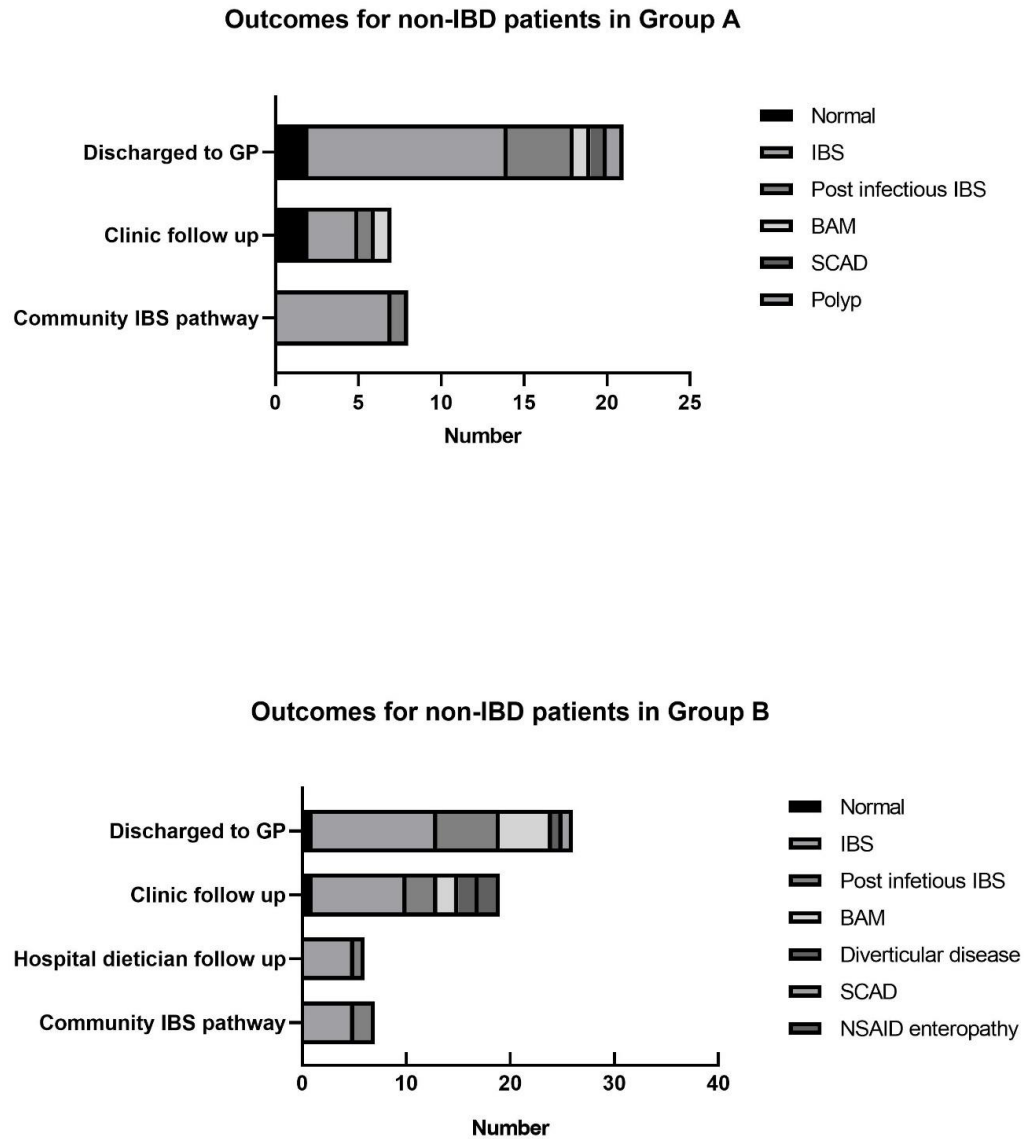**Supplementary Figure 3: Outcomes for Non-IBD Patients**

*IBS, irritable bowel syndrome; BAM, bile salt malabsorption; SCAD, Segmental colitis associated with diverticulosis; NSAID, non-steroidal anti-inflammatory drug*

**Supplementary Figure 4**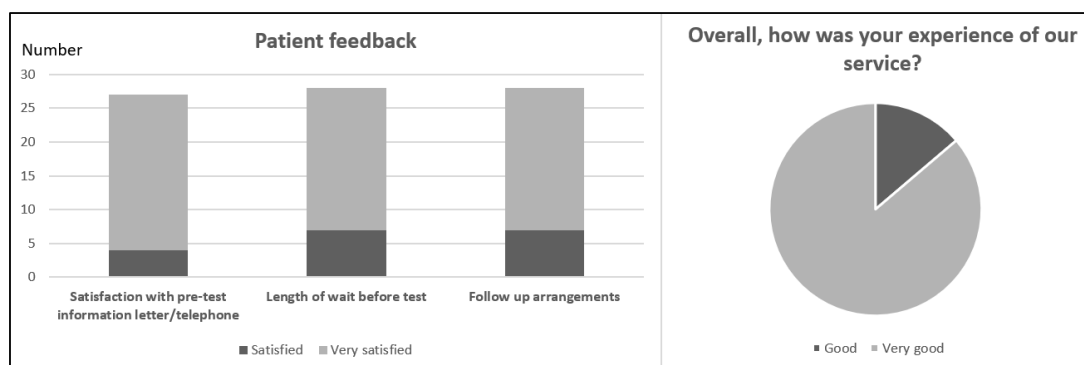**Supplementary Figure 4: Patient feedback for the new pathway**
